# Supplementary material for: Reverted exhaustion phenotype of circulating lymphocytes as immune correlate of anti-PD1 first-line treatment in Hodgkin lymphoma
Source: PubMed Central journal article supplement (PMC8885413; doi:10.1038/s41375-021-01421-z), 2021-09-28
Supplement: 41375_2021_1421_MOESM2_ESM.pdf [file 41375_2021_1421_MOESM2_ESM.pdf]

# Supplementary Figure 1

CLINICAL TRIAL

TRANSLATIONAL STUDY

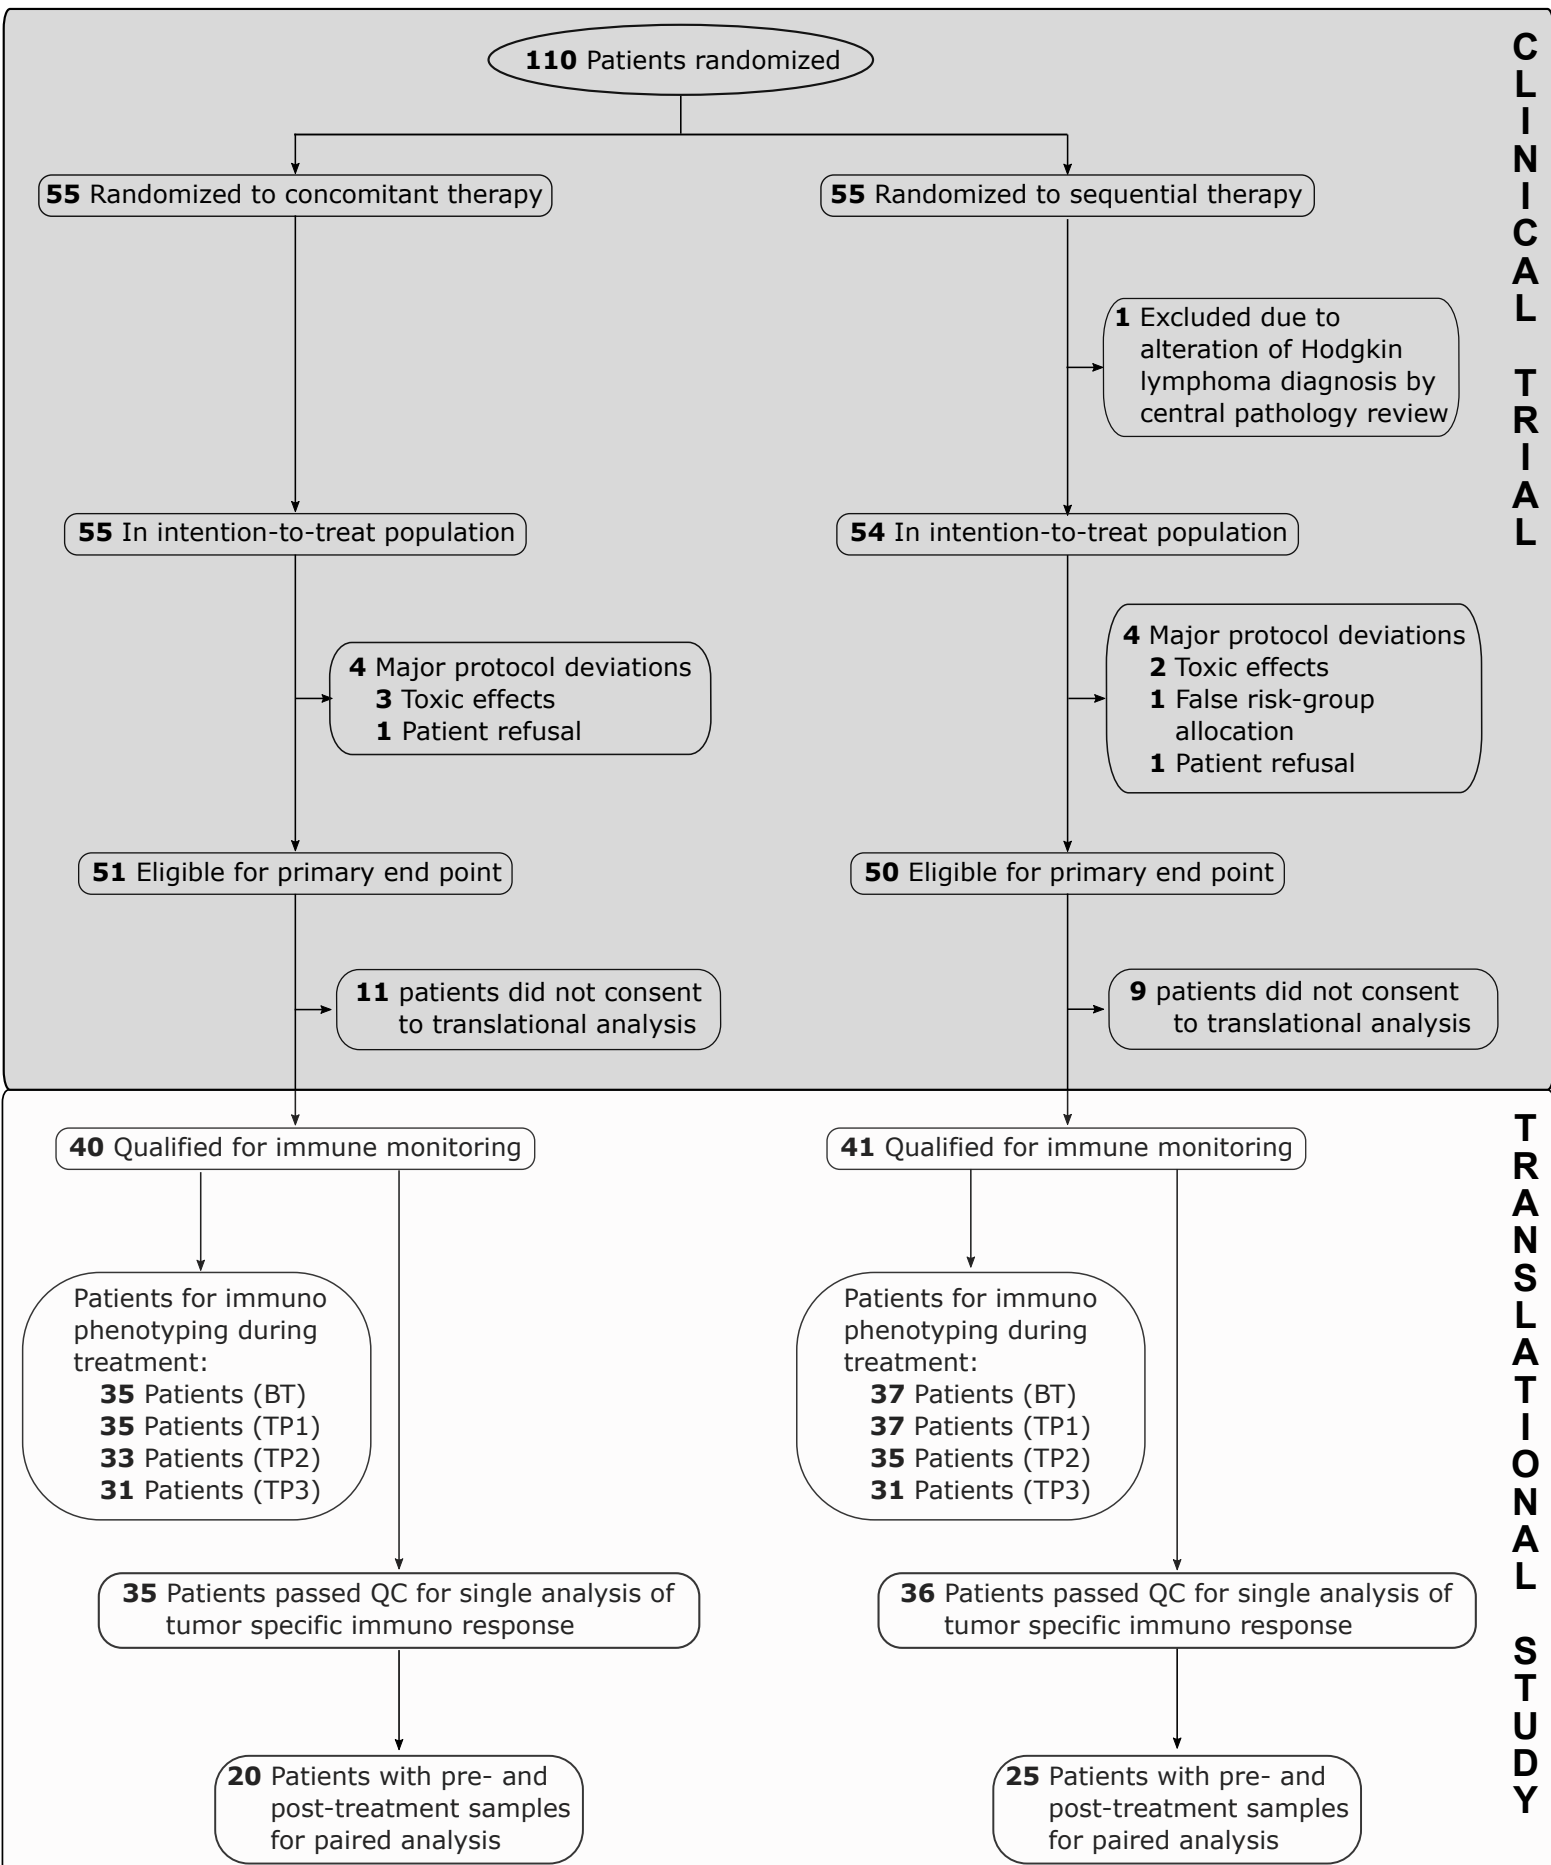

BT: Before treatment, TP1: 1 week after treatment initiation, TP2: 8 week after treatment initiation, TP3: after completion of four cycles of AVD treatment
