# Supplementary material for: Reverted exhaustion phenotype of circulating lymphocytes as immune correlate of anti-PD1 first-line treatment in Hodgkin lymphoma
Source: PubMed Central journal article supplement (PMC8885413; doi:10.1038/s41375-021-01421-z), 2021-09-28

# Supplementary Figure 4

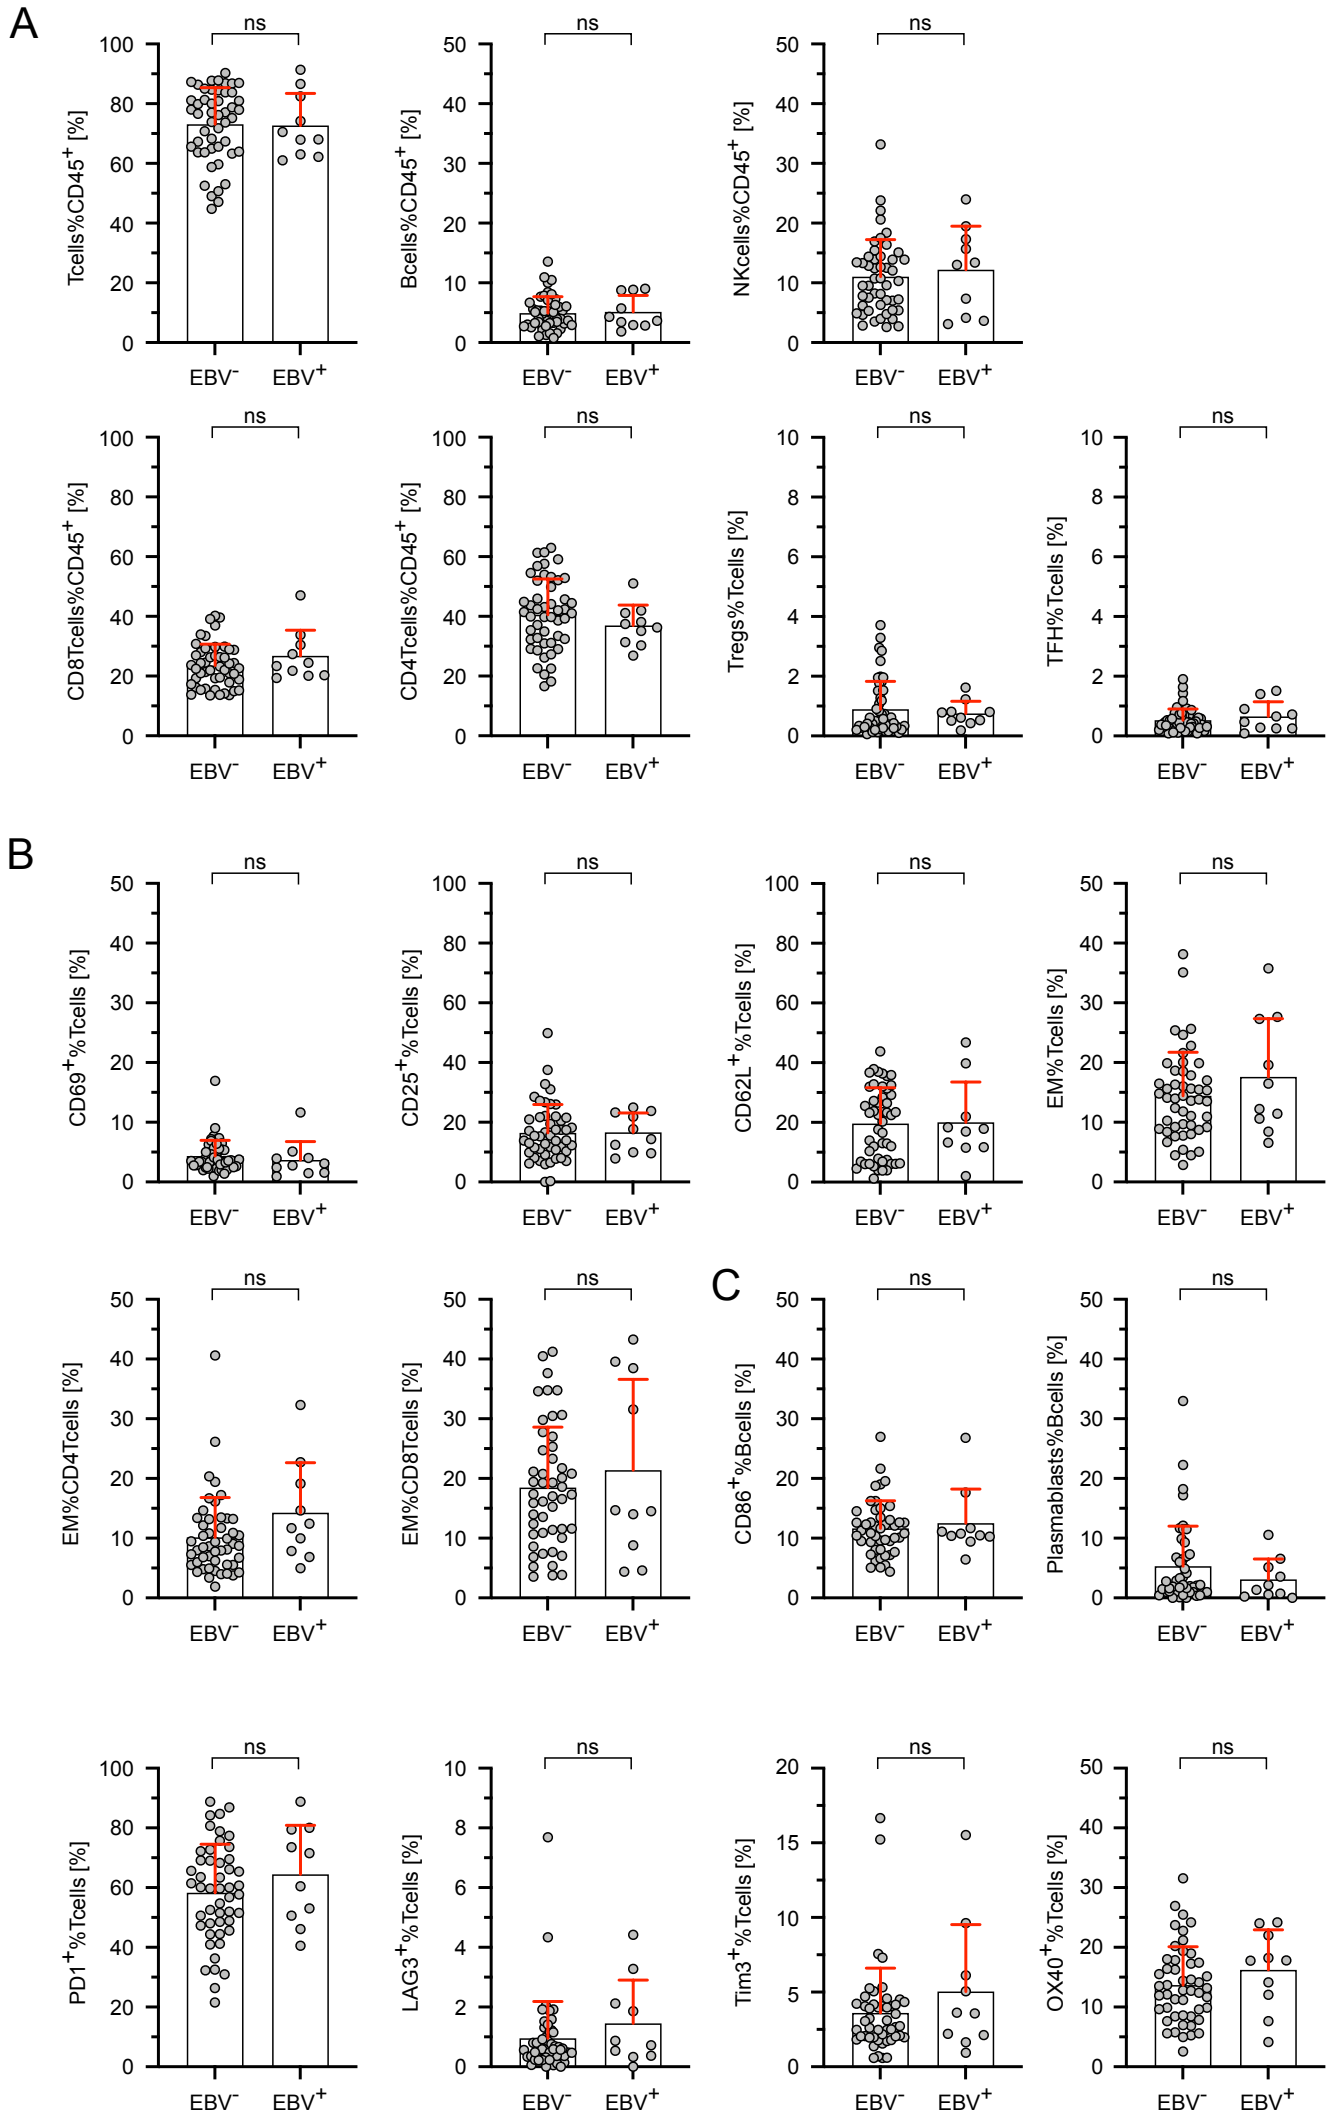

Supplement: 41375_2021_1421_MOESM5_ESM.pdf [file 41375_2021_1421_MOESM5_ESM.pdf]
